# Supplementary material for: Cerebellar nuclei cells produce distinct pathogenic spike signatures in mouse models of ataxia, dystonia, and tremor
Source: eLife. 2024 Jul 29;12:RP91483. doi: 10.7554/eLife.91483 (PMC11286262; doi:10.7554/eLife.91483)
Supplement: Figure 1—source data 1. [file elife-91483-fig1-data1.xlsx]

## Sheet: Figure 1 + Supp Figures
MouseID	Group	Firing Rate	Mean ISI^-1	Median ISI^-1	CV	CV2	Skewness	ISI_25	ISI_100	IBP	Kurtosis	RI	OPN
Mut1331	Ataxia	133.386	136.132	133.333	0.139594	0.120578	-0.00039798	0	0	0	20.9198	0.974032	2
Mut1331	Ataxia	71.1524	76.7504	68.8705	0.23115	0.123873	-0.0325929	0	0	0	32.9428	1.23872	5
Mut1331	Ataxia	102.228	114.278	109.649	0.347921	0.204355	0.070051	0.293542	0	0	14.3137	0.282125	1
Mut1331	Ataxia	75.4045	83.3242	74.0741	0.263975	0.151373	-0.0178012	1.37168	0	0	30.8713	1.37304	4
Mut1331	Ataxia	110.755	114.306	110.375	0.168645	0.137479	-0.00343677	0	0	0	23.6604	1.21563	2
Mut1331	Ataxia	81.1536	83.5478	80.5153	0.160559	0.142191	-0.00789668	0	0	0	32.991	1.46229	4
Mut1331	Ataxia	84.1163	94.3278	78.9889	0.283756	0.16675	-0.0628723	0	0	0	25.4754	1.31833	4
Mut1331	Ataxia	79.488	89.7713	75.0751	0.272487	0.152125	-0.0571015	0	0	0	26.9295	1.39923	4
Mut1331	Ataxia	52.4811	62.3976	57.4713	0.491068	0.362901	0.0907692	16.6985	0.0637349	0.15024	20.4459	0.135576	1
Mut1331	Ataxia	86.1103	95.0054	91.5751	0.311023	0.344151	0.0615114	0.348432	0	0	16.8344	0.381935	1
Mut1332	Ataxia	42.4467	44.7713	42.4088	0.207322	0.244167	-0.000893883	38.6006	0	0	36.9207	0.525515	2
Mut1332	Ataxia	35.0182	65.1799	39.8248	0.733883	0.372239	0.128445	50.1905	1.42857	0.14514	19.981	0.0634387	1
Mut1342	Ataxia	15.4018	19.4567	16.1031	0.461612	0.220118	0.0445204	91.974	9.32755	0	58.2251	0.0609725	1
Mut1342	Ataxia	113.667	134.405	113.379	0.353607	0.212994	-0.00253878	0	0	0	12.522	0.53941	2
Mut1483	Ataxia	103.626	116.434	109.649	0.333717	0.239498	0.0564791	0.0321854	0	0	11.3578	0.208327	1
Mut1483	Ataxia	51.444	54.3436	54.2888	0.281707	0.205986	0.0538108	8.36576	0	0.07428	40.1167	0.680563	2
Mut1483	Ataxia	152.191	163.798	146.199	0.236538	0.117324	-0.0401605	0	0	0	15.7249	0	0
Mut1483	Ataxia	112.389	128.5	106.838	0.273246	0.146507	-0.0506491	0	0	0	21.8861	2.13389	4
Mut1483	Ataxia	80.9228	84.8527	80.1282	0.210462	0.261747	-0.00986787	0.0412201	0	0	27.1117	1.15778	4
Mut1483	Ataxia	55.7836	70.3168	61.9579	0.507028	0.48067	0.104878	16.9258	0	0	15.4812	0	0
Mut322	Ataxia	95.1779	121.968	92.081	0.422562	0.243356	-0.033076	0.490368	0	0	17.6471	0.521091	2
Mut322	Ataxia	87.4962	106.831	86.3558	0.266389	0.188848	-0.0131188	0	0	0	22.6667	0.62237	2
Mut322	Ataxia	59.0779	80.959	61.6145	0.41879	0.279916	0.0420346	11.5254	0	0.0747	19.9887	0.16989	1
Mut322	Ataxia	69.5827	84.7744	78.2473	0.487934	0.272014	0.117224	6.47172	0.0479386	0.08895	13.2247	0.0668673	1
Control1153	Control	52.8432	78.4846	61.5006	0.61739	0.476787	0.151428	23.6742	0	0	13.4385	0	0
Control1153	Control	36.7603	44.4036	40.4531	0.511264	0.433282	0.0956503	49.3176	0.363967	0.13092	26.7273	0.0612596	1
Control1215	Control	69.2552	72.8027	69.4444	0.201563	0.246408	0.00272858	0.0963391	0	0	32.9803	1.97749	7
Control1215	Control	66.9402	87.3484	77.1605	0.579117	0.512005	0.14185	9.81565	0	0.0864	12.251	0	0
Control1215	Control	39.2288	50.413	44.9843	0.534064	0.477608	0.13669	40.9014	0	0	18.2668	0	0
Control1215	Control	56.5911	74.268	63.3714	0.558679	0.511763	0.11304	17.3451	0	0.09687	15.2123	0	0
Control1215	Control	101.787	117.411	106.838	0.375662	0.424628	0.0484184	0.294792	0	0	12.3117	0.113355	1
Control828	Control	64.9454	94.4028	62.8931	0.462811	0.429746	-0.0321082	7.70416	0	0	22.5359	0.40443	3
Control828	Control	61.6288	71.2646	62.7749	0.352203	0.431997	0.0184253	7.14286	0	0	21.6333	0.0750444	1
Control828	Control	47.6169	80.8285	56.8828	0.758504	0.414795	0.17734	27.8011	0.70028	0.120634	16.3051	0.0624554	1
Control892	Control	76.9825	87.7934	79.3651	0.340468	0.390217	0.0304777	0.953206	0	0	16.6739	0.113361	1
Control892	Control	38.765	42.6602	40.1606	0.298598	0.363242	0.035365	49.5697	0	0	34.3078	0.237846	2
Control892	Control	68.9296	77.3523	70.6215	0.325643	0.374839	0.0242471	2.70924	0	0	20.2611	0.226523	1
Ctrl1287	Control	54.719	58.6778	56.1167	0.247832	0.273228	0.0252216	7.25168	0	0	31.3033	0.663169	3
Ctrl1287	Control	93.5026	105.415	96.8992	0.3348	0.385937	0.0356783	0.178317	0	0	13.2264	0.224956	1
Ctrl1287	Control	68.2671	92.0838	76.4526	0.537188	0.500127	0.113122	10.0635	0	0	12.0605	0.0541164	1
Ctrl1298	Control	130.013	148.835	141.243	0.382999	0.373283	0.0827992	0.102564	0	0	8.12612	0	0
Ctrl1298	Control	92.4768	101.188	95.7854	0.298195	0.324166	0.0351489	0.0721241	0	0	14.7801	0.417743	2
Ctrl1298	Control	105.347	122.073	111.111	0.373321	0.394331	0.0532598	0.126582	0	0	10.9459	0.100936	1
Ctrl1298	Control	101.24	111.707	105.485	0.322992	0.330311	0.0410671	0.16469	0	0	13.9282	0.476107	2
Ctrl1298	Control	25.382	37.4607	33.3333	0.778723	0.600014	0.270844	63.2895	4.60526	0.24597	20.1051	0	0
Ctrl1323	Control	43.0102	46.6475	43.1779	0.212707	0.237433	0.00389048	33.4368	0	0	44.186	0.638959	3
Ctrl1323	Control	60.2608	65.6398	63.3714	0.314297	0.27251	0.0503202	6.0321	0	0	22.4004	0.3681	2
Ctrl1323	Control	34.4754	41.9971	38.7597	0.470888	0.471346	0.117	52.9526	0	0	23.7911	0.0666073	1
Ctrl1323	Control	67.6127	88.8753	76.1035	0.545807	0.50803	0.11816	9.52146	0	0.08514	12.426	0	0
Ctrl1323	Control	71.5416	89.9205	78.2473	0.489382	0.419752	0.0895344	5.50117	0	0.08004	13.4203	0.0594911	1
Ctrl1323	Control	46.4888	52.8258	50.2008	0.384049	0.292204	0.0767819	24.7667	0	0	23.9598	0.168229	1
Ctrl1323	Control	65.4409	80.1795	71.2251	0.459385	0.442323	0.0846465	8.51172	0	0	14.1111	0.0658743	1
Ctrl1323	Control	30.2073	40.2617	35.6888	0.582586	0.581048	0.166367	58.1858	0.884956	0	21.989	0	0
Ctrl1474	Control	63.7937	74.9034	67.2043	0.395297	0.435271	0.0520703	7.63199	0	0	16.1964	0	0
Ctrl1474	Control	70.7105	95.9346	85.034	0.639508	0.54648	0.183937	9.90566	0.0471698	0.11772	9.99529	0	0
Ctrl161221	Control	67.8434	82.89	73.0994	0.43474	0.420943	0.074584	6.93215	0	0	14.8894	0.16435	2
Ctrl161221	Control	67.8434	82.89	73.0994	0.43474	0.420943	0.074584	6.93215	0	0	14.8894	0.16435	2
Mut1152	Dystonia	40.671	75.1571	63.857	1.04025	0.526882	0.443632	29.6144	2.46103	0.152213	9.67213	0	0
Mut1158	Dystonia	51.7245	71.4398	61.7284	0.611603	0.555611	0.176353	24.049	0	0	13.3376	0	0
Mut1158	Dystonia	23.0742	71.9464	59.312	1.89406	0.694852	0.879705	35.8382	9.39306	0.336898	10.3896	0	0
Mut1158	Dystonia	17.7156	32.7163	25.9202	1.07478	0.707328	0.37605	72.7955	12.3827	0.43484	27.1536	0	0
Mut1158	Dystonia	10.5178	55.871	15.768	0.977942	0.881657	0.39947	84.3949	31.5287	0.51762	31.4286	0.0536131	1
Mut1158	Dystonia	25.1362	52.8806	34.2936	0.920111	0.64449	0.308174	57.7689	6.90571	0.235703	19.2308	0.0591593	1
Mut1158	Dystonia	44.8197	102.803	79.3651	1.38844	0.61233	0.556354	23.0082	2.60611	0.167902	7.29167	0	0
Mut1158	Dystonia	36.3647	100.109	81.6993	2.66202	0.676158	0.767968	19.7984	3.29973	0.378032	7.87546	0	0
Mut1159	Dystonia	28.5688	55.0913	45.4753	1.34982	0.658215	0.456659	43.2243	5.49065	0.299672	14.7025	0.112989	2
Mut1159	Dystonia	12.9642	36.0813	25.7404	1.33721	0.648504	0.660194	68.5567	20.1031	0.503365	21.8509	0.34361	5
Mut1177	Dystonia	39.7571	122.591	71.2251	1.145	0.859734	0.567082	32.1278	3.70059	0.152264	11.3445	0	0
Mut1177	Dystonia	50.5932	84.2386	70.028	0.886665	0.672695	0.322245	23.6651	0.725115	0.12964	10.2767	0	0
Mut1177	Dystonia	41.0957	94.6535	65.8762	1.18934	0.703134	0.463308	28.4322	2.84322	0.170114	9.82143	0.100117	1
Mut1333	Dystonia	25.9915	40.6052	28.9352	0.570785	0.529612	0.107185	72.4005	1.54044	0	32.3077	0	0
Mut1333	Dystonia	25.1132	51.7592	34.4353	0.916837	0.809176	0.31309	55.3785	7.56972	0.21712	18.1698	0	0
Mut1383	Dystonia	31.8925	53.497	40.8999	0.782095	0.685794	0.24748	48.6402	2.09205	0.21684	17.3459	0	0
Mut754	Dystonia	8.08367	24.4832	14.1123	1.14552	0.837902	0.543221	78.6611	40.1674	0	40	0.143292	2
Mut754	Dystonia	26.539	37.8464	31.506	0.617941	0.593147	0.171144	66.5409	2.38994	0	24.1206	0	0
Mut849	Dystonia	36.2274	73.7758	60.3865	1.28168	0.682335	0.500116	31.6759	3.95948	0.22268	9.47562	0	0
Mut849	Dystonia	66.232	94.4208	85.4701	0.782955	0.564612	0.25363	12.286	0.20141	0.0976533	9.20986	0	0
p207	Dystonia	56.6811	71.414	61.2745	0.466893	0.509561	0.0778836	16.1765	0	0	16.2845	0	0
p207	Dystonia	20.7995	81.8985	54.5852	2.27724	0.849133	0.896354	39.3258	9.95185	0.306391	10.5769	0	0
p207	Dystonia	43.8422	71.9453	52.6318	0.709191	0.602381	0.182217	33.1811	0.380518	0.125307	15.8175	0	0
p207	Dystonia	37.7097	64.5476	50.6073	1.07391	0.563841	0.292075	34.9248	1.94518	0.214542	14.2226	0.0533442	1
Control1541	Tremor	51.6657	116.591	92.081	1.52622	0.656321	0.562312	16.9787	2.64687	0.149175	6.77419	0	0
Ctrl1287H	Tremor	114.639	131.387	127.226	0.493516	0.324716	0.10409	1.80337	0	0.04842	11.3987	0.113095	1
Ctrl1287H	Tremor	41.7695	47.884	44.0917	0.342877	0.369718	0.054092	37.6198	0	0	30.6464	0.175525	1
Ctrl1287H	Tremor	46.2812	73.4668	56.9802	0.763271	0.596225	0.207222	26.9452	0.504323	0.126334	13.8229	0	0
Ctrl1287H	Tremor	33.6301	64.0722	49.6032	0.975991	0.691382	0.383814	37.996	3.27381	0.187674	12.5867	0.0822078	1
Ctrl1287H	Tremor	108.028	125.565	129.199	0.584816	0.319119	0.178488	2.83951	0	0.051576	14.224	0.38513	1
Ctrl1287H	Tremor	65.5166	140.917	109.649	1.27282	0.803363	0.503895	15.369	1.01781	0.107646	5.64598	0	0
Ctrl1287H	Tremor	73.6293	121.231	95.7854	0.975887	0.623102	0.261562	9.29284	0.634633	0.0946125	8.47304	0	0
Ctrl1323H	Tremor	86.8859	135.478	95.2381	0.524801	0.698848	0.0917196	2.45587	0	0	12.85	0.659911	3
Ctrl1323H	Tremor	19.4966	63.3243	45.6621	1.36939	0.868768	0.803133	45.1115	15.2659	0.256665	16.4384	0.0967613	1
Ctrl1323H	Tremor	58.4651	84.5399	82.9187	0.888104	0.562679	0.345918	12.721	0.11409	0.11055	11.9726	0.174822	1
Ctrl1323H	Tremor	131.429	180.13	168.35	0.876032	0.470999	0.246321	2.28311	0.0253678	0.05593	5.4527	0	0
EL1073xH	Tremor	37.4707	79.6083	62.8141	0.902215	0.849414	0.505429	34.5503	1.06857	0.153093	17.0819	0.0821095	1
EL1073xH	Tremor	66.8337	146.532	86.5062	0.820907	0.925242	0.256587	16.2338	0	0.0680533	9.43585	0	0
EL1073xH	Tremor	101.709	184.155	166.667	1.10029	0.658605	0.484076	9.57377	0	0.0565271	5.14585	0.359472	1
MH407	Tremor	96.5612	160.059	112.613	0.892311	0.74216	0.153474	4.9146	0.0348554	0.075904	7.52613	0	0
MH407	Tremor	29.5436	78.4123	44.0141	1.18922	0.901383	0.393445	46.2687	3.78875	0.14576	18.3486	0	0
MH407	Tremor	94.9927	127.039	114.679	0.664768	0.479891	0.187782	4.563	0	0.0588343	8.70175	0.0862095	1
MH407	Tremor	109.217	254.275	201.613	1.34819	0.836694	0.594514	7.75573	0.0610687	0.0573687	3.47985	0.240076	1
MH407	Tremor	69.0783	107.019	92.5926	1.09801	0.45762	0.290891	8.83631	0.482859	0.104213	9.55598	0.0516091	1
SCA1-457	Tremor	36.9524	45.7044	40.1606	0.470065	0.398817	0.0832088	49.3225	0.0903342	0	25.0903	0.0730667	1
SCA1-457	Tremor	43.0855	53.4951	50.9684	0.625355	0.40849	0.167625	29.7988	0.541796	0.13008	18.7162	0.0877321	1
SCA1-457	Tremor	65.2614	102.033	81.6993	0.828565	0.61525	0.223705	10.5263	0.102197	0.085468	10.6231	0	0
SCA1-457	Tremor	87.0594	149.442	134.409	1.35502	0.627614	0.427595	7.6982	0.651092	0.0937937	5.20674	0	0
