# Supplementary material for: Cerebellar nuclei cells produce distinct pathogenic spike signatures in mouse models of ataxia, dystonia, and tremor
Source: eLife. 2024 Jul 29;12:RP91483. doi: 10.7554/eLife.91483 (PMC11286262; doi:10.7554/eLife.91483)
Supplement: Figure 2—source data 1. [file elife-91483-fig2-data1.xlsx]

## Sheet: Figure 2D-E
Group	Skewness	CV2	ISI_25
Ank1	0.0260804	0.443436	10.4717
Ank1	0.369515	0.434274	6.53775
Ank1	0.0908299	0.504335	3.51182
Ank1	0.173162	0.386925	4.49827
Ank1	0.311183	0.337339	6.80831
Ank1	0.0475914	0.307269	0.971731
Ank1	0.318389	0.405547	9.73502
Ank1	0.351809	0.412652	11.8343
Ank1	0.0117047	0.549825	24.7268
Ank1	0.130148	0.502231	4.06054
Ank1	0.157449	0.48181	2.69058
Ank1	0.258502	0.647554	71.0526
Ank1	0.0899946	0.540144	41.8358
Ank1	0.0501104	0.544642	61.5023
Control	-0.00673552	0.720028	42.5308
Control	0.078951	0.483586	2.42967
Control	0.0291953	0.362328	0.0948467
Control	0.00594096	0.690964	79.3939
Control	0.161964	0.542543	54.908
Control	0.0867007	0.67101	67.9214
Control	0.0215508	0.436707	75.4386
Control	0.0372617	0.530893	23.0123
Control	0.0947513	0.47612	33.5044
Control	0.16214	0.808426	92.1739
Control	0.26505	0.403817	1.19546
Control	0.0930146	0.325468	0.328731
Control	0.172204	0.45833	5.11338
Control	-0.000333965	0.856525	25.3125
Control	0.0496208	0.365783	0.153186
Control	0.153297	0.611238	3.66022
Control	0.119016	0.186446	0.380409
Control	0.110574	0.345178	0.312622
Control	0.173597	0.415555	5.00511
Control	0.0841525	0.431946	54.0806
Control	0.133883	0.416593	3.68284
Control	0.0356674	0.654574	14.8691
Control	0.113281	0.536541	58.9689
Control	0.0765653	0.405746	11.2416
Control	0.155984	0.504794	35.0507
Control	0.161006	0.400101	15.5529
Control	0.105765	0.46713	23.3399
Sca1	0.2588	0.529107	41.5683
Sca1	0.158797	0.656993	64.7152
Sca1	0.18428	0.414857	26.6997
Sca1	0.197046	0.311173	24.2744
Sca1	0.0581289	0.416593	82.7815
Sca1	0.025849	0.654574	77.6398
Sca1	0.262888	0.311173	53.3051
Sca1	0.133377	0.549825	57.0776
Sca1	0.329252	0.502231	106.157
Sca1	0.0732848	0.48181	99.2063
Sca1	0.100725	0.26948	59.1017
Sca1	0.0484323	0.331875	49.9002
Sca1	0.45082	0.463725	114.155
Sca1	0.0943246	0.492567	60.3865
Sca1	0.0392881	0.509073	55.9284
Sca1	0.0857552	0.37591	51.4403
Sca1	0.284496	0.481731	84.1751
Sca1	0.0544991	0.272844	64.5995
Sca1	0.14674	0.423781	65.1042
Sca1	0.0109802	0.35515	90.0901
Sca1	0.0328189	0.18649	110.375
Sca1	0.00899239	0.496046	54.6448
Sca1	0.118343	0.496239	102.881
Sca1	0.0724745	0.443436	72.4638
Sca1	0.197442	0.634167	67.4764
Sca1	0.133197	0.415221	49.6032
Sca1	0.0827398	0.209344	106.838
Sca1	0.199416	0.434274	80.9061
Sca1	0.0391818	0.504335	114.155
Sca1	0.212629	0.386925	73.4214
Sca1	0.127821	0.337339	78.9889
Sca1	0.37368	0.307269	78.2473
Sca1	0.0922716	0.405547	64.8508
Sca1	0.0532236	0.412652	66.9344
