# Supplementary material for: Cerebellar nuclei cells produce distinct pathogenic spike signatures in mouse models of ataxia, dystonia, and tremor
Source: eLife. 2024 Jul 29;12:RP91483. doi: 10.7554/eLife.91483 (PMC11286262; doi:10.7554/eLife.91483)
Supplement: Figure 3—source data 1. [file elife-91483-fig3-data1.xlsx]

## Sheet: Figure 3D-E
Group	Skewness	CV2	ISI_25
Control	0.0456552	0.429403	30.7692
Control	0.0202821	0.199541	0.0598982
Control	0.0672915	0.346714	8.76897
Control	0.0368348	0.304776	80.5195
Control	-0.0113613	0.392784	0
Control	-0.031777	0.505299	6.62283
Control	0.447342	0.597944	32.4752
Control	0.0829584	0.522718	8.45552
Control	0.108865	0.505632	38.6196
Control	0.120778	0.496093	47.1199
Control	0.0266413	0.411873	3.67758
Control	0.126341	0.679419	70.0428
Control	0.0351075	0.365406	6.95129
Control	0.0690846	0.374772	2.42898
Control	0.112722	0.465342	10.3166
Control	0.369494	0.772548	29.5753
Control	0.0887183	0.527328	6.05096
Control	0.0361129	0.426894	0.0997672
Control	0.124135	0.51355	20.2051
Control	0.0720223	0.544261	2.10877
Control	0.120817	0.413386	85.1852
Control	0.0510143	0.5726	0.123916
Control	-0.0752711	0.145011	0.151515
Control	0.0904755	0.44439	2.53863
Control	-0.0229566	0.399377	13.6168
Control	0.0913759	0.409312	24.2612
Control	0.240807	0.517292	21.1728
Control	0.153441	0.582635	37.6559
Ouabain	0.341006	0.548228	20
Ouabain	0.730657	0.876589	28.6788
Ouabain	0.0181784	0.322843	94.1019
Ouabain	0.0165699	0.309078	1.79487
Ouabain	0.584846	1.48732	44.7561
Ouabain	0.203393	0.589205	24.2867
Ouabain	0.211882	0.734643	77.2917
Ouabain	0.32769	1.12994	47.6091
Ouabain	0.486889	0.713185	35.707
Ouabain	0.113675	0.699961	46.9805
Ouabain	0.221659	0.580288	7.38201
Ouabain	0.0777148	0.546211	87.7049
Ouabain	0.0329553	0.546434	35.572
Ouabain	0.780411	1.23457	57.8947
Ouabain	0.56379	0.97707	21.6765
Ouabain	1.1777	1.11301	37.931
Ouabain	0.370836	0.871257	54.2029
Ouabain	0.947184	1.16734	43.949
Ouabain	0.0670771	0.500489	82.9545
Ouabain	0.237721	0.715178	65.8501
Ouabain	-0.0256095	0.371306	19.288
Pdx1Vglut2	-0.27974	0.430916	14.7891
Pdx1Vglut2	0.0122133	0.345553	2.61122
Pdx1Vglut2	0.00426018	0.376899	24.0028
Pdx1Vglut2	-0.216426	0.457333	10.995
Pdx1Vglut2	0.069615	0.477382	16.2573
Pdx1Vglut2	0.0763684	0.483612	85.9532
Pdx1Vglut2	0.288316	0.395213	32.6545
Pdx1Vglut2	0.0515301	0.693724	15.6659
Pdx1Vglut2	-0.0660607	0.428823	15.8965
Pdx1Vglut2	0.112057	0.528526	0.0437445
Pdx1Vglut2	0.220642	0.632863	59.0392
Pdx1Vglut2	0.113342	0.461506	0.327332
Pdx1Vglut2	0.0435188	0.436867	25.1377
Pdx1Vglut2	0.244817	0.660976	60.7562
Pdx1Vglut2	0.451887	0.630842	39.0079
Pdx1Vglut2	0.241381	0.638892	66.6185
Pdx1Vglut2	0.0979039	0.758464	28.877
Pdx1Vglut2	0.02285	0.25585	22.4946
Pdx1Vglut2	0.0395744	0.309569	52.847
Pdx1Vglut2	0.0554704	0.359492	25.1564
Pdx1Vglut2	0.895265	1.13107	37.5969
Pdx1Vglut2	0.0715423	0.443891	40.806
Pdx1Vglut2	0.174715	0.65703	85.4118
