# Supplementary material for: Cerebellar nuclei cells produce distinct pathogenic spike signatures in mouse models of ataxia, dystonia, and tremor
Source: eLife. 2024 Jul 29;12:RP91483. doi: 10.7554/eLife.91483 (PMC11286262; doi:10.7554/eLife.91483)
Supplement: Figure 4—source data 1. [file elife-91483-fig4-data1.xlsx]

## Sheet: Figure 4D-E
Group	Skewness	CV2	ISI_25
Car8	0.0272191	0.447217	5.00496
Car8	0.771387	0.445893	3.85935
Car8	0.528344	0.568061	17.6667
Car8	0.554962	0.598004	56.982
Car8	1.11994	0.289706	3.86905
Car8	0.318545	0.559154	41.0681
Car8	0.0911251	0.253966	4.0857
Car8	0.665184	0.560201	60.0806
Car8	0.284836	0.433603	2.30076
Car8	0.587608	0.322651	2.18301
Car8	0.388973	0.335734	2.78384
Car8	0.333798	0.253299	3.46838
Car8	0.1981	0.275549	8.48794
Car8-prop	0.193451	0.396578	4.73221
Car8-prop	0.0233192	0.435008	1.81336
Car8-prop	1.10436	0.521592	18.8251
Car8-prop	0.557836	0.585267	24.3983
Car8-prop	0.0835328	0.536937	96.5839
Car8-prop	0.757985	0.462383	27.234
Car8-prop	0.144981	0.475628	49.1961
Car8-prop	0.484444	0.534013	62.2837
Car8-prop	0.518533	0.318028	59.9668
Car8-prop	0.52538	0.768999	49.5751
Car8-prop	0.0282679	0.20384	88.4555
Car8-prop	0.0411308	0.364326	52.1662
Car8-prop	0.0413787	0.492127	66.2295
Car8-prop	0.0917218	0.251652	9.26254
Car8-prop	0.130232	0.479049	57.8892
Control	0.16049	0.481504	13.711
Control	0.0230164	0.420181	0
Control	0.0886448	0.535426	68.9001
Control	0.0824073	0.44326	21.5545
Control	0.0512309	0.338711	68.8914
Control	-0.00078733	0.407257	32.46
Control	0.103408	0.472017	22.1039
Control	0.00566299	0.340563	29.7455
Control	0.176732	0.6177	31.2782
Control	-0.00629405	0.466928	69.8302
Control	0.0165415	0.367629	1.46536
Control	0.056782	0.486265	0.0230787
Control	0.0615802	0.395252	6.98644
Control	0.0835267	0.608147	14.9387
