# Supplementary material for: Cerebellar nuclei cells produce distinct pathogenic spike signatures in mouse models of ataxia, dystonia, and tremor
Source: eLife. 2024 Jul 29;12:RP91483. doi: 10.7554/eLife.91483 (PMC11286262; doi:10.7554/eLife.91483)
Supplement: Figure 5—source data 1. [file elife-91483-fig5-data1.xlsx]

## Sheet: Figure 5G-H
Stimulation	skewness	CV2	Pause25
0_Baseline	0.0948225	0.536713	6.90909
0_Baseline	0.0984948	0.483512	2.65222
0_Baseline	0.105809	0.491273	8.71249
0_Baseline	0.10097	0.491852	1.64393
0_Baseline	0.129931	0.474524	9.29893
0_Baseline	0.0808959	0.454904	4.93019
0_Baseline	0.159267	0.446565	11.7743
0_Baseline	0.135102	0.495712	3.92601
0_Baseline	0.0838911	0.402418	2.18341
0_Baseline	0.0215153	0.376977	0.0328192
0_Baseline	0.074588	0.339164	2.42599
0_Baseline	0.155243	0.525599	18.5407
0_Baseline	0.0969564	0.429283	8.95062
0_Baseline	0.0932226	0.385842	3.17657
0_Baseline	0.0374879	0.382994	0
0_Baseline	0.10663	0.395226	4.97999
0_Baseline	0.0903908	0.424102	18.7616
0_Baseline	0.0727502	0.416929	2.36156
0_Baseline	0.140449	0.517202	8.40993
0_Baseline	0.149646	0.450495	2.17966
0_Baseline	0.0770969	0.370638	0.223001
0_Baseline	0.0733119	0.354924	0.19274
0_Baseline	0.117423	0.475648	2.20049
0_Baseline	0.076436	0.409784	4.75518
0_Baseline	0.0754235	0.363273	0.906555
0_Baseline	0.109933	0.335555	4.38111
1_Ataxia	0.228772	0.496344	28.1494
1_Ataxia	0.121208	0.642291	3.66758
1_Ataxia	0.0535981	0.487802	5.74004
1_Ataxia	0.12208	0.43267	2.76899
1_Ataxia	0.108751	0.443687	11.5482
1_Ataxia	0.376367	0.49897	21.8954
1_Ataxia	0.40694	0.750656	63.4146
1_Ataxia	0.209062	0.509255	0.870748
1_Ataxia	0.294847	0.55086	23.7239
1_Ataxia	0.187003	0.565223	66.3309
1_Ataxia	0.349808	0.580651	21.1375
1_Ataxia	0.0737425	0.492395	11.3218
1_Ataxia	-0.0111051	0.475135	7.9602
1_Ataxia	0.226237	0.516338	27.5307
1_Ataxia	0.208795	0.50078	24.0464
1_Ataxia	0.129923	0.354605	4.75983
2_Dystonia	0.811437	0.588152	20.4809
2_Dystonia	0.14998	0.448561	17.855
2_Dystonia	0.310691	0.533682	40.0966
2_Dystonia	0.577522	0.626859	43.5762
2_Dystonia	0.483611	0.512153	36.7983
2_Dystonia	0.118956	0.467311	0.236518
2_Dystonia	0.243764	0.527942	20.1139
2_Dystonia	0.362497	0.556506	46.9989
2_Dystonia	0.353575	0.621416	32.0861
2_Dystonia	0.27749	0.640722	18.97
2_Dystonia	0.160607	0.514337	13.9096
2_Dystonia	0.0829127	0.458489	3.61233
2_Dystonia	0.437302	0.592415	5.02658
2_Dystonia	0.203904	0.527159	5.60821
2_Dystonia	0.30179	0.520847	21.9986
2_Dystonia	0.142687	0.478318	16.5495
3_Tremor	0.361941	0.696259	17.2275
3_Tremor	0.449662	0.733624	16.4847
3_Tremor	0.62135	0.851999	21.9309
3_Tremor	0.266311	0.63424	10.9595
3_Tremor	0.202674	0.586278	9.41531
3_Tremor	0.349831	0.783214	20.4188
3_Tremor	0.378395	0.606552	11.2554
3_Tremor	0.256829	0.544688	15.4607
3_Tremor	0.154287	0.516027	25.1847
3_Tremor	0.148373	0.468042	15.2786
3_Tremor	0.258296	0.49546	5.39924
3_Tremor	0.217993	0.484302	12.9767
3_Tremor	0.346933	0.70295	41.43
3_Tremor	0.255237	0.549143	13.7025
3_Tremor	0.265874	0.506012	9.97262
3_Tremor	0.267612	0.545023	10.4064
