# Supplementary material for: Cerebellar nuclei cells produce distinct pathogenic spike signatures in mouse models of ataxia, dystonia, and tremor
Source: eLife. 2024 Jul 29;12:RP91483. doi: 10.7554/eLife.91483 (PMC11286262; doi:10.7554/eLife.91483)
Supplement: Figure 6—source data 1. [file elife-91483-fig6-data1.xlsx]

## Sheet: Figure 6I-K + M + P-T
Figure	Panel	Baseline	Ataxia	Dystonia	Tremor
6	I	7.52418	5.89595	6.40765	6.02372
		6.43999	5.89065	4.75397	4.86554
		5.39783	2.79105	3.45496	3.58518
		7.50614	4.32411	3.5351	4.62808
		6.65353	4.99378	4.94639	6.57788
		6.6082	4.83745	6.00221	5.09016
		5.75837	3.47463	3.88677	4.0515
		6.94175	7.17044	7.04341	6.62602
Figure	Panel	Baseline	Ataxia	Dystonia	Tremor
6	J	7.66591	6.32988	6.59246	6.16416
		6.58192	5.9563	4.88872	4.83275
		5.49028	2.74633	3.36863	3.44412
		7.59358	4.88017	3.92512	4.49596
		6.90473	4.77562	4.8623	6.58309
		6.90976	5.13909	6.35826	5.29137
		6.01579	3.67785	4.01756	4.09077
		7.17699	7.10317	7.06522	6.81038
Figure	Panel	Baseline	Ataxia	Dystonia	Tremor
6	K	0.888796	2.29774	0.935889	1.47171
		0.8838	1.15842	2.36255	1.3466
		0.565705	1.29242	1.2169	1.19327
		0.993116	2.16299	1.83575	1.59883
		0.962174	1.73645	2.57717	1.65087
		0.853164	3.10212	2.13352	1.62751
		0.727494	1.44916	1.81308	0.749182
		0.658831	0.891279	0.856769	0.913194
Figure	Panel	Baseline	Ataxia	Dystonia	Tremor
6	M	0	2	5	1
		0	1	4	1
		0	3	3	1
		0	2	4	1
		0	3	4	1
		0	2	3	1
		0	3	4	1
		0	3	3	1
Figure	Panel	Baseline	Ataxia	Dystonia	Tremor
6	P	3.81334	3.54508	15.9085	54.862
		3.9854	8.88874	21.1045	363.016
		3.26527	10.5952	14.2206	98.9341
		5.18059	9.81414	19.0085	334.787
		3.33744	3.29236	9.60606	195.268
		3.40662	8.16893	14.2845	347.454
		7.46909	3.35562	6.74817	278.57
		2.74438	3.34201	7.00377	119.567
Figure	Panel	Condition	Dystonia Rating	Hind to Fore Distance	Power
6	Q-T	Baseline	0	0.888796	3.81334
		Baseline	0	0.8838	3.9854
		Baseline	0	0.565705	3.26527
		Baseline	0	0.993116	5.18059
		Baseline	0	0.962174	3.33744
		Baseline	0	0.853164	3.40662
		Baseline	0	0.727494	7.46909
		Baseline	0	0.658831	2.74438
		Ataxia	2	2.29774	3.54508
		Ataxia	1	1.15842	8.88874
		Ataxia	3	1.29242	10.5952
		Ataxia	2	2.16299	9.81414
		Ataxia	3	1.73645	3.29236
		Ataxia	2	3.10212	8.16893
		Ataxia	3	1.44916	3.35562
		Ataxia	3	0.891279	3.34201
		Dystonia	5	0.935889	15.9085
		Dystonia	4	2.36255	21.1045
		Dystonia	3	1.2169	14.2206
		Dystonia	4	1.83575	19.0085
		Dystonia	4	2.57717	9.60606
		Dystonia	3	2.13352	14.2845
		Dystonia	4	1.81308	6.74817
		Dystonia	3	0.856769	7.00377
		Tremor	1	1.47171	54.862
		Tremor	1	1.3466	363.016
		Tremor	1	1.19327	98.9341
		Tremor	1	1.59883	334.787
		Tremor	1	1.65087	195.268
		Tremor	1	1.62751	347.454
		Tremor	1	0.749182	278.57
		Tremor	1	0.913194	119.567
